# Supplementary material for: Unveiling the Black Box of Diagnostic and Clinical Decision Support Systems for Antenatal Care: Realist Evaluation
Source: PubMed Central journal article supplement (PMC6320439; doi:10.2196/11468), 2018-12-21
Supplement: mhealth_v6i12e11468_app1.pdf [file mhealth_v6i12e11468_app1.pdf]

## Multimedia Appendix 1

### Data collection activities and Respondents

|                          | Interviews                                                                                     | Health Facility survey | B4M User survey | ANC observations* | B4M observations |
|--------------------------|------------------------------------------------------------------------------------------------|------------------------|-----------------|-------------------|------------------|
| <b>Upper East Region</b> | - 1 program manager<br>- 1 district health information officer<br>- 1 district health director | N/A                    | N/A             | N/A               | N/A              |
| Facility A               | - 3 health workers<br>- 1 health facility manager                                              | 1                      | 3               | Yes               | Yes              |
| Facility B               | - 2 health workers<br>- 1 health facility manager                                              | 1                      | 2               | Yes               | Yes              |
| Facility C               | - 3 health workers<br>- 1 health facility manager**                                            | 1                      | 3               | No                | No               |
| Facility D               | - 2 health workers<br>- 1 health facility manager**                                            | 1                      | 2               | Yes               | Yes              |
| <b>Total</b>             | <b>15 respondents</b>                                                                          |                        |                 |                   |                  |
| <b>Northern Region</b>   | - 1 program manager<br>- 1 district health information officer                                 | N/A                    | N/A             | N/A               | N/A              |
| Facility E               | - 3 health workers;<br>- 1 health facility manager                                             | 1                      | 2               | Yes               | No               |
| Facility F               | - 2 health workers<br>- 1 health facility manager                                              | 1                      | 2               | Yes               | No               |
| <b>Total</b>             | <b>9 respondents</b>                                                                           |                        |                 |                   |                  |
| <b>Mixed</b>             | - FGD with 5 consortium members                                                                | N/A                    | N/A             | N/A               | N/A              |
|                          | - Data validation meeting with 16 B4M users                                                    | N/A                    | N/A             | N/A               | N/A              |
|                          | <b>21 respondents</b>                                                                          |                        |                 |                   |                  |

\* B4M device was not always in use during ANC observations even when present in the facility

\*\* Health facility manager was also a B4M user
