# Supplementary material for: Unveiling the Black Box of Diagnostic and Clinical Decision Support Systems for Antenatal Care: Realist Evaluation
Source: PubMed Central journal article supplement (PMC6320439; doi:10.2196/11468), 2018-12-21
Supplement: mhealth_v6i12e11468_app2.pdf [file mhealth_v6i12e11468_app2.pdf]

## Multimedia Appendix 2

### BLISS4MIDWIVES (B4M): QUESTIONNAIRE ON PERCEIVED USEFULNESS & EASE OF USE

*(Bring out printed color-coded sheet for likert scale and explain the colors to respondent. Ask respondent to point to which square/color applies for each statement that you make. Tick the appropriate box in the survey sheet. Following responses, probe further before moving to the next question)*

Date of Interview ..... Location ..... Interviewer Initials .....

Health Facility: Name..... District .....

Initials of Midwife/CHN ..... Assigned Project Code .....

Confirmation of Consent:(Yes/No) ..... Type of Consent: (Verbal/Written) .....

|   | STATEMENT                                                                                                                                                                                                                                                                      | Disagree |    | Neith<br>er | Agree |    |
|---|--------------------------------------------------------------------------------------------------------------------------------------------------------------------------------------------------------------------------------------------------------------------------------|----------|----|-------------|-------|----|
|   |                                                                                                                                                                                                                                                                                | -2       | -1 | 0           | +1    | +2 |
| 1 | I think using B4M has made me more effective in my job.<br><i>(Probe: In what aspects of your job are you now more effective? Do you think it is the device that caused that?)</i>                                                                                             |          |    |             |       |    |
| 2 | I think using B4M made it possible for me to attend to conduct ANC quickly.<br><i>(Probe: Is it important to you that you can quickly attend to clients? Why?)</i>                                                                                                             |          |    |             |       |    |
| 3 | Using B4M increased my workload<br><i>(Probe: How? All the time or only sometimes?)</i>                                                                                                                                                                                        |          |    |             |       |    |
| 4 | With B4M, I am now able to do more things<br><i>(Probe: i.e. productivity. In what way? e.g. see more women, conduct tests and diagnose immediately, keep patient records easily. Do you feel you were less productive without B4M??)</i>                                      |          |    |             |       |    |
| 5 | With B4M I am now able to test patients properly for Anaemia, Pre-Eclampsia and Gestational Diabetes<br><i>(Probe: How did women get tested for PE, Anaemia &amp; GDm before?)</i>                                                                                             |          |    |             |       |    |
| 6 | It is easier to do ANC consultations now that I use B4M<br><i>(Probe: What aspect of ANC services did you find difficult when you were not using B4M? Which part of B4M do you feel makes your work easier- px history, diagnosis, risk classification or px counselling?)</i> |          |    |             |       |    |
| 7 | I think more pregnant women are coming for ANC now that we use B4M in the Health Facility<br><i>(Probe: Why do you think women were not coming for ANC before? How do you feel B4M solves that</i>                                                                             |          |    |             |       |    |

|    |                                                                                                                                                                                                                                                |  |  |  |  |  |
|----|------------------------------------------------------------------------------------------------------------------------------------------------------------------------------------------------------------------------------------------------|--|--|--|--|--|
|    | <i>problem?)</i>                                                                                                                                                                                                                               |  |  |  |  |  |
| 8  | I think that the pregnant women follow my advice more now that I use B4M for consultation.<br><b>(Probe: Why do you think they comply more now?)</b>                                                                                           |  |  |  |  |  |
| 9  | I do not trust the diagnosis that I get from the B4M device.<br><b>(Probe: Why do you trust the diagnosis? What type of tests would you prefer?)</b>                                                                                           |  |  |  |  |  |
| 10 | It is now easier for me to refer women that I identify as being at risk for Anaemia, Pre-Eclampsia and Gestational Diabetes.<br><b>(Probe: Was this a difficulty in the past? In what way?)</b>                                                |  |  |  |  |  |
| 11 | I am not satisfied with using B4M for ANC consultations                                                                                                                                                                                        |  |  |  |  |  |
| 12 | Using B4M improves my performance as a Health care worker<br><b>(Probe: Can you give an example of when you felt your performance improved?)</b>                                                                                               |  |  |  |  |  |
| 13 | Operating the B4M system is easy for me<br><b>(Probe: What aspects of the device do you find difficult (e.g. typing, using the diagnostic sets, reading the traffic lights etc.))</b>                                                          |  |  |  |  |  |
| 14 | The system is too complex for me to use<br><b>(Probe: Are there any parts that you find easy or the entire system is complex?)</b>                                                                                                             |  |  |  |  |  |
| 15 | I am confident in my ability to use B4M<br><b>(Probe: Do you think you are able to teach a new member of staff that has not been trained on how to use it?)</b>                                                                                |  |  |  |  |  |
| 16 | I think I need more training on how to use B4M<br><b>(Probe: Do you want training on every aspect of the system or just some specific things?)</b>                                                                                             |  |  |  |  |  |
| 17 | I like the traffic light signalling function of the decision-support<br><b>(Probe: Show picture of the traffic lights. Ask midwife to tell you what the colours mean. What exactly does she like (or not like) about the lights function?)</b> |  |  |  |  |  |
| 18 | The results and recommendations of the B4M confuses me<br><b>(Probe: Can you remember a time when the system confused you? Give specific example.)</b>                                                                                         |  |  |  |  |  |
| 19 | I find it easy to update information in the patients file using B4M                                                                                                                                                                            |  |  |  |  |  |
| 20 | It is difficult for me to do the Haemoglobin test using B4M                                                                                                                                                                                    |  |  |  |  |  |
| 21 | It is easy for me to take blood pressure using B4M                                                                                                                                                                                             |  |  |  |  |  |

|        |                                                                                                                                                                    |  |  |  |  |  |
|--------|--------------------------------------------------------------------------------------------------------------------------------------------------------------------|--|--|--|--|--|
| 2<br>2 | The urine glucose and protein tests are easy for me to do                                                                                                          |  |  |  |  |  |
| 2<br>3 | I usually need someone to assist me when I want to use the B4M system ( <b>Probe:</b> <i>Who usually assists you when you need help?</i> )                         |  |  |  |  |  |
| 2<br>4 | It is easier for me to use the usual system of ANC than with B4M ( <b>Probe:</b> <i>What (if any) are the advantages of the standard system in your opinion?</i> ) |  |  |  |  |  |
| 2<br>5 | What is the most positive aspect(s) of using B4M? ( <i>audio recorded</i> )                                                                                        |  |  |  |  |  |
| 2<br>6 | What is the most negative aspect(s) of using B4M? ( <i>audio recorded</i> )                                                                                        |  |  |  |  |  |

***Return to section 7 of the interview guide***
