# Supplementary material for: Unveiling the Black Box of Diagnostic and Clinical Decision Support Systems for Antenatal Care: Realist Evaluation
Source: PubMed Central journal article supplement (PMC6320439; doi:10.2196/11468), 2018-12-21
Supplement: mhealth_v6i12e11468_app3.pdf [file mhealth_v6i12e11468_app3.pdf]

### Multimedia Appendix 3

#### CHECKLIST: FACILITY CAPACITY FOR PROVISION OF ANC SERVICES

Date ..... Interviewer Initials ..... Location.....

Health Facility Name.....

|                                                                                                                                                           | Yes | No | Irregular |
|-----------------------------------------------------------------------------------------------------------------------------------------------------------|-----|----|-----------|
| <b>Equipment and Resources</b>                                                                                                                            |     |    |           |
| Microscope                                                                                                                                                |     |    |           |
| Gloves and other disposables like cotton swabs                                                                                                            |     |    |           |
| Urine specimen bottles                                                                                                                                    |     |    |           |
| Sphygmomanometer + Stethoscope                                                                                                                            |     |    |           |
| Pinnards Stethoscope                                                                                                                                      |     |    |           |
| Dipsticks for urinary protein and glucose                                                                                                                 |     |    |           |
| Weight scale                                                                                                                                              |     |    |           |
| Height scale                                                                                                                                              |     |    |           |
| Measuring tape                                                                                                                                            |     |    |           |
| Transportation support for emergency referral                                                                                                             |     |    |           |
| Ultrasound                                                                                                                                                |     |    |           |
| ITNs for new registrants                                                                                                                                  |     |    |           |
| Electricity ( <i>is it regular? is there backup for emergencies? What kind?</i> )                                                                         |     |    |           |
| <b>Drugs/Medication</b>                                                                                                                                   |     |    |           |
| Nifedipine                                                                                                                                                |     |    |           |
| MgSo <sub>4</sub>                                                                                                                                         |     |    |           |
| Diazepam                                                                                                                                                  |     |    |           |
| Tetanus Toxoid                                                                                                                                            |     |    |           |
| Antimalarial                                                                                                                                              |     |    |           |
| Folic Acid tablets                                                                                                                                        |     |    |           |
| Iron tablets                                                                                                                                              |     |    |           |
| <b>Which of these do you have full capacity to diagnose in this HF?</b><br><i>If no, where do patients go for tests? Are tests free? If no, how much?</i> |     |    |           |
| Pregnancy Test                                                                                                                                            |     |    |           |
| Rhesus Incompatibility                                                                                                                                    |     |    |           |
| Pre-eclampsia / Eclampsia                                                                                                                                 |     |    |           |
| Anaemia                                                                                                                                                   |     |    |           |
| Gestational diabetes                                                                                                                                      |     |    |           |
| Malaria                                                                                                                                                   |     |    |           |
| Urinary tract Infection                                                                                                                                   |     |    |           |
| <b>Which of these do you have the capacity to manage in this health facility?</b>                                                                         |     |    |           |
| Pre-eclampsia / Eclampsia                                                                                                                                 |     |    |           |
| Anaemia                                                                                                                                                   |     |    |           |
| Gestational diabetes                                                                                                                                      |     |    |           |
| Malaria                                                                                                                                                   |     |    |           |
| Urinary tract Infection                                                                                                                                   |     |    |           |
| <b>Do you have the capacity to take deliveries in health facility? At all times of the day and night?</b>                                                 |     |    |           |
