# Supplementary material for: Unveiling the Black Box of Diagnostic and Clinical Decision Support Systems for Antenatal Care: Realist Evaluation
Source: PubMed Central journal article supplement (PMC6320439; doi:10.2196/11468), 2018-12-21
Supplement: mhealth_v6i12e11468_app4.pdf [file mhealth_v6i12e11468_app4.pdf]

## **Multimedia Appendix 4**

### Characteristics of B4M users and Usability survey scores

| <b>Health Facility <sup>a</sup></b> | <b>Age</b> | <b>Cadre / Gender</b>           | <b>Years of experience</b> | <b>Score, Perceived Usefulness</b> | <b>Score, Perceived Ease of use</b> |
|-------------------------------------|------------|---------------------------------|----------------------------|------------------------------------|-------------------------------------|
| <b>Low Usage Cluster</b>            |            |                                 |                            |                                    |                                     |
| Facility B                          |            |                                 |                            |                                    |                                     |
|                                     | 31 years   | Midwife / F                     | 5 years                    | 45                                 | 48                                  |
|                                     | 35 years   | Midwife / F                     | 10 years                   | 59                                 | 52                                  |
|                                     |            |                                 |                            | <b>52.0</b>                        | <b>50.0</b>                         |
| Facility C                          |            |                                 |                            |                                    |                                     |
|                                     | 27 years   | Midwife / F                     | 4 years                    | 54                                 | 56                                  |
|                                     | 27 years   | Enrolled Nurse <sup>b</sup> / F | 2 years                    | 54                                 | 59                                  |
|                                     | 33 years   | Midwife + Facility Manager / F  | 7 years                    | 49                                 | 55                                  |
|                                     |            |                                 |                            | <b>52.3</b>                        | <b>56.7</b>                         |
| Facility E                          |            |                                 |                            |                                    |                                     |
|                                     | 35 years   | Health Assistant / F            | 10 years                   | 54                                 | 44                                  |
|                                     | 27 years   | Enrolled Nurse <sup>b</sup> / F | 2 years                    | 49                                 | 39                                  |
|                                     | 57 years   | Community health nurse / F      | 32 years                   | -                                  | -                                   |
|                                     |            |                                 |                            | <b>51.5</b>                        | <b>41.5</b>                         |
| <b>Moderate Usage Cluster</b>       |            |                                 |                            |                                    |                                     |
| Facility A                          |            |                                 |                            |                                    |                                     |
|                                     | 30 years   | Midwife / F                     | 5 years                    | 47                                 | 56                                  |
|                                     | 33 years   | Midwife / F                     | 9 years                    | 52                                 | 55                                  |
|                                     | 30 years   | Midwife / M                     | 5 years                    | 46                                 | 46                                  |
|                                     |            |                                 |                            | <b>48.3</b>                        | <b>52.3</b>                         |
| Facility D                          |            |                                 |                            |                                    |                                     |
|                                     | 24 years   | Community health nurse / F      | 2 years                    | 53                                 | 56                                  |
|                                     | 50 years   | Midwife + Facility Manager / F  | 28 years                   | 53                                 | 60                                  |
|                                     |            |                                 |                            | <b>53.0</b>                        | <b>58.0</b>                         |
| Facility F                          |            |                                 |                            |                                    |                                     |
|                                     | 28 years   | Midwife / F                     | 4 years                    | 41                                 | 51                                  |
|                                     | 53 years   | Midwife / F                     | 27 years                   | 37                                 | 36                                  |
|                                     |            |                                 |                            | <b>39.0</b>                        | <b>43.5</b>                         |

<sup>a</sup> Facility A is the ANC unit of a district hospital and is the first level referral point for facilities B, C and D, which are health centers. Facility E is an independent public health unit of a district hospital, while F is a health center.

<sup>b</sup> An auxiliary cadre similar to health assistants
